# Supplementary material for: High-throughput single-cell profiling of B cell responses following inactivated influenza vaccination in young and older adults
Source: Aging (Albany NY). 2023 Jun 26;15(18):9250–74. doi: 10.18632/aging.204778 (PMC10564424; doi:10.18632/aging.204778)
Supplement: Supplementary Figures [file aging-15-204778-s001.pdf]

## SUPPLEMENTARY FIGURES

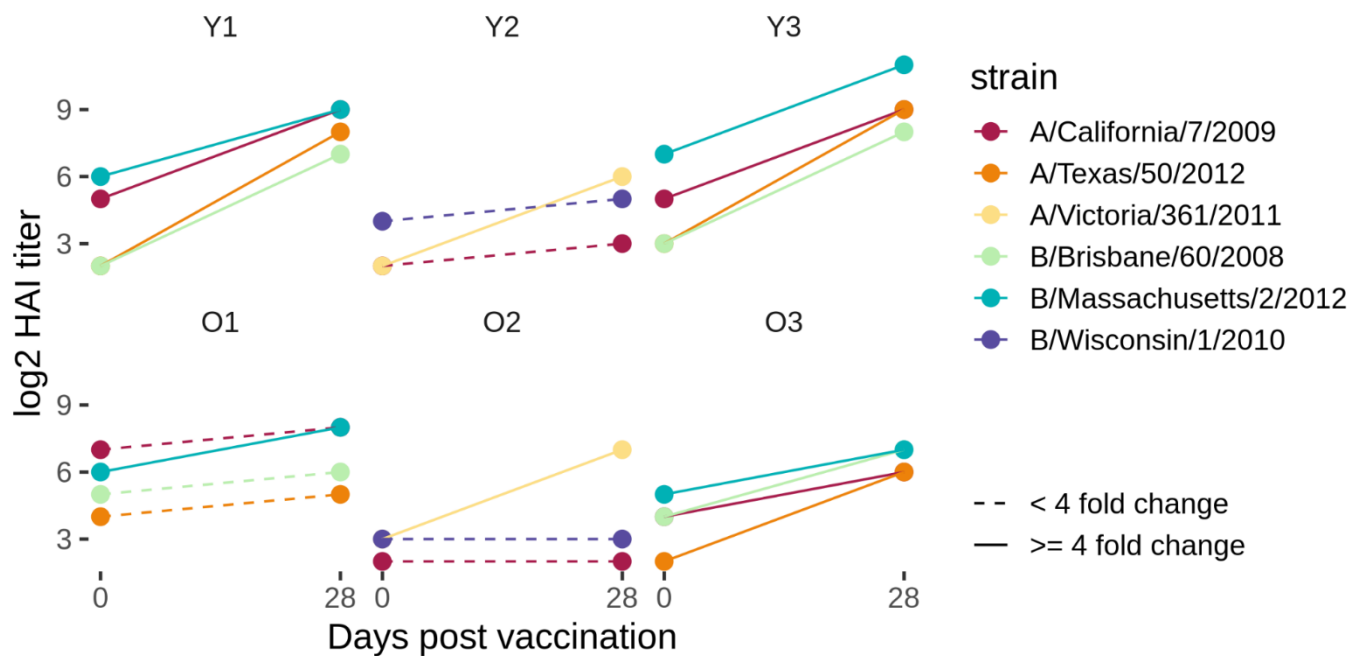

**Supplementary Figure 1. Hemagglutination inhibition assay titers of vaccine strains pre-vaccination and day 7 post-vaccination.** The x-axis indicates the post-vaccination time point. The y-axis indicates the log2 fold change in HAI titer. The color indicates the vaccine strain. Note that Y2 and O2 received the trivalent standard-dose influenza vaccine during the 2012-2013 season, while Y1, Y3, O1 and O3 received the 2014-2015 quadrivalent standard-dose vaccine.

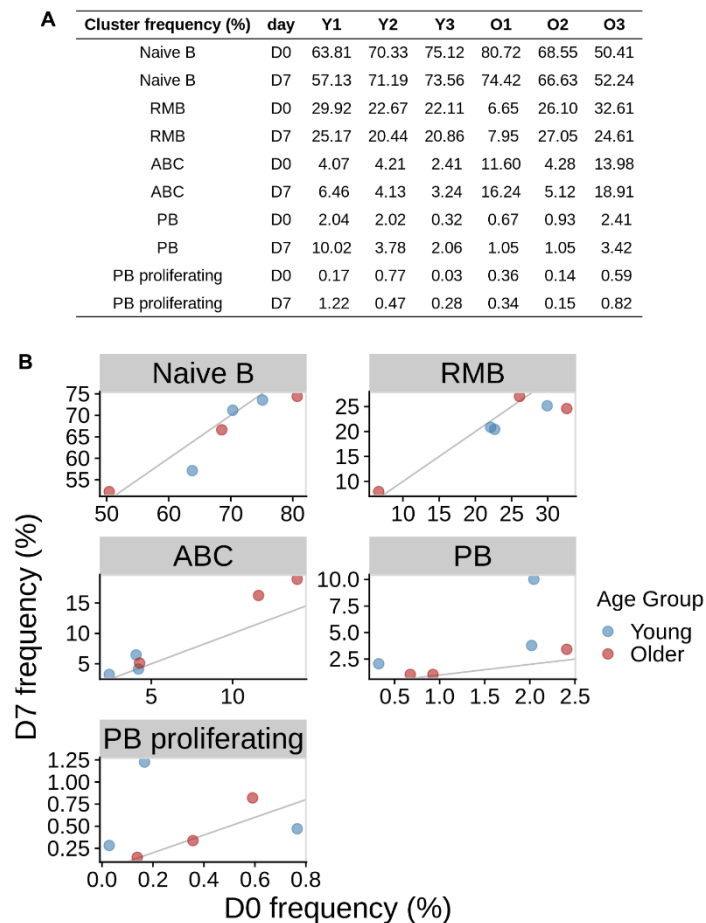

**Supplementary Figure 2. B cell cluster frequency for each subject at each time point.** (A) B cell cluster frequencies of each sample. (B) Scatter plot of the frequency of the cluster between D0 and D7. The gray diagonal line has a slope of 1 and an intercept of 0. Data points above the diagonal line are samples with increased frequency of the given cluster at D7.

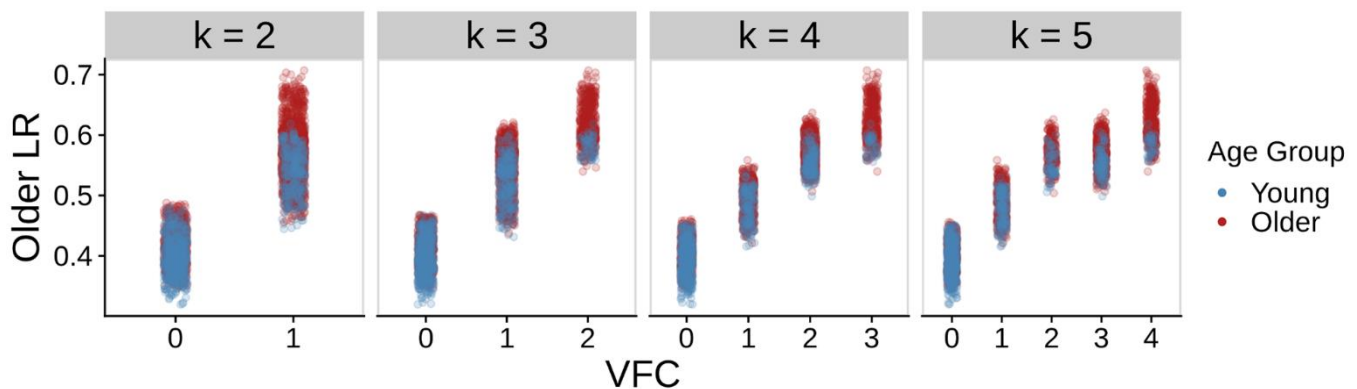

**Supplementary Figure 3. Choice of the number of VFC clusters  $k$  to identify differentially abundant ABC subpopulations at pre-vaccination.** The x-axis is the cluster id and the y-axis is the relative likelihood of observing the cell in older relative to young adults. The color indicates the age group labels.  $k = 3$  is the final choice of the number of clusters.

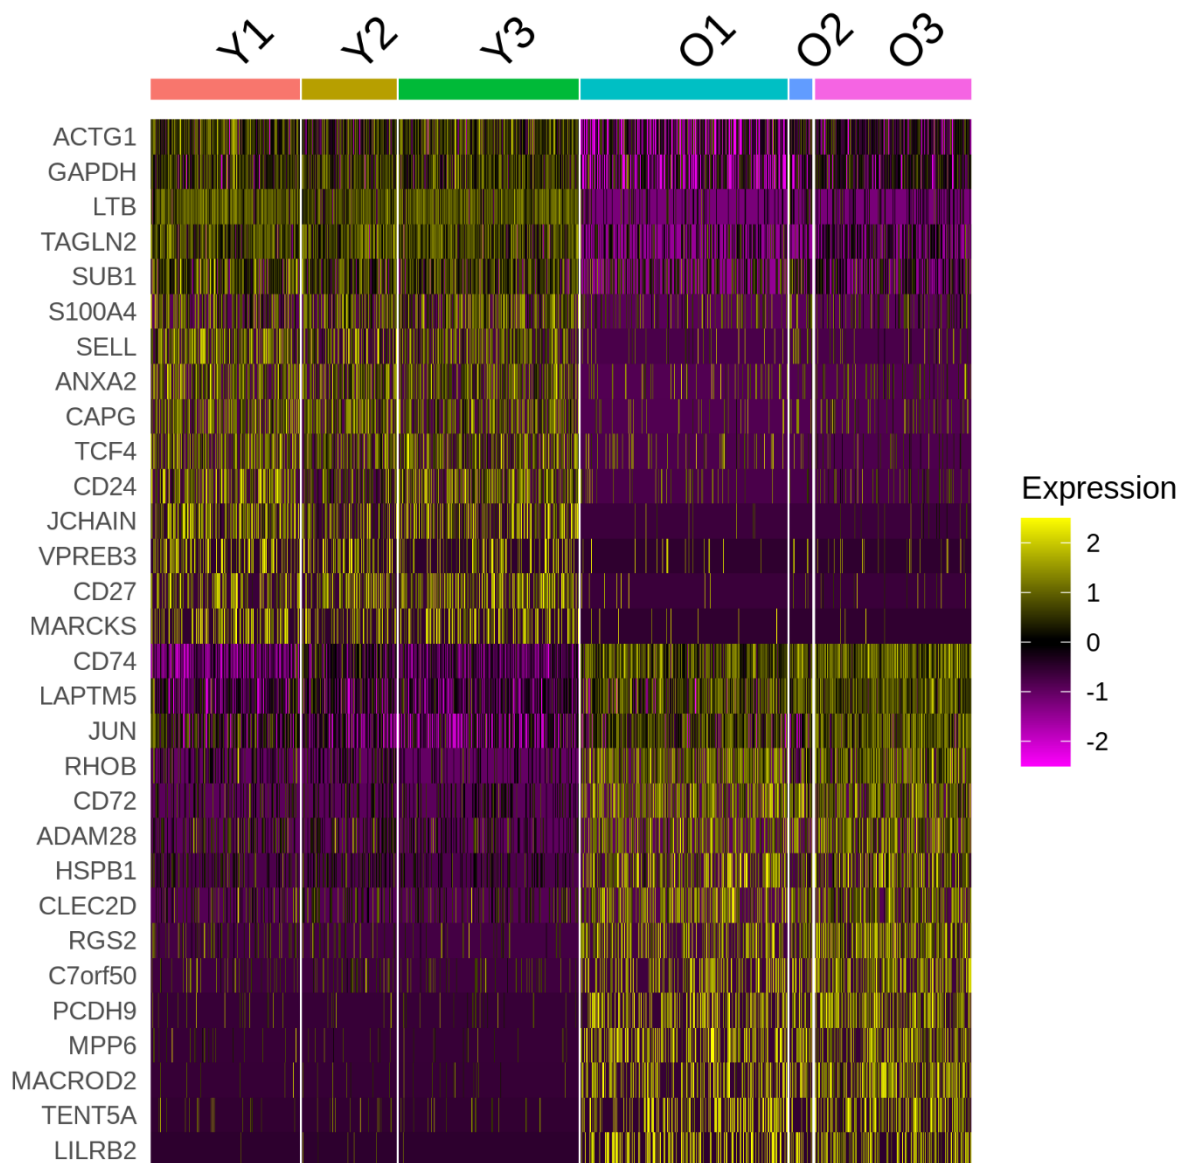

**Supplementary Figure 4. Top 30 Differentially expressed genes between older and young adults enriched activated B cells at pre-vaccination baseline.** Pseudobulk gene expression analysis was performed on the VFC clusters with the highest and lowest older-adult associated relative likelihood to find significantly differentially expressed genes with a Bonferroni adjusted p-value of 0.05.

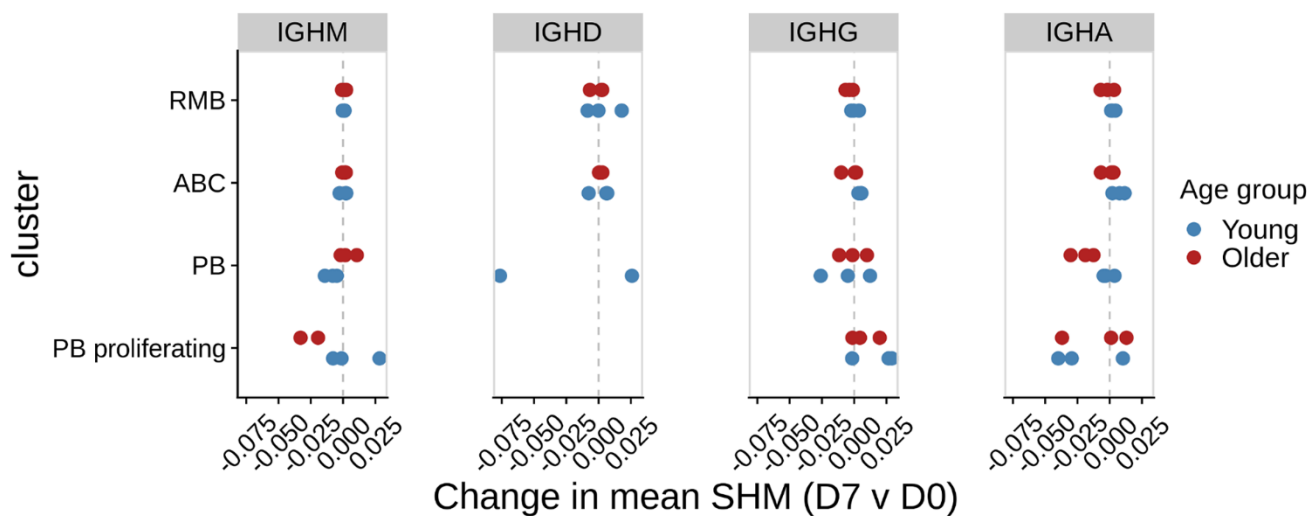

**Supplementary Figure 5. Difference in the mean somatic hypermutation frequency between D7 and D0.** Mutation frequency computed from the heavy chain V segments for each isotype and B cell types. The color indicates age group.

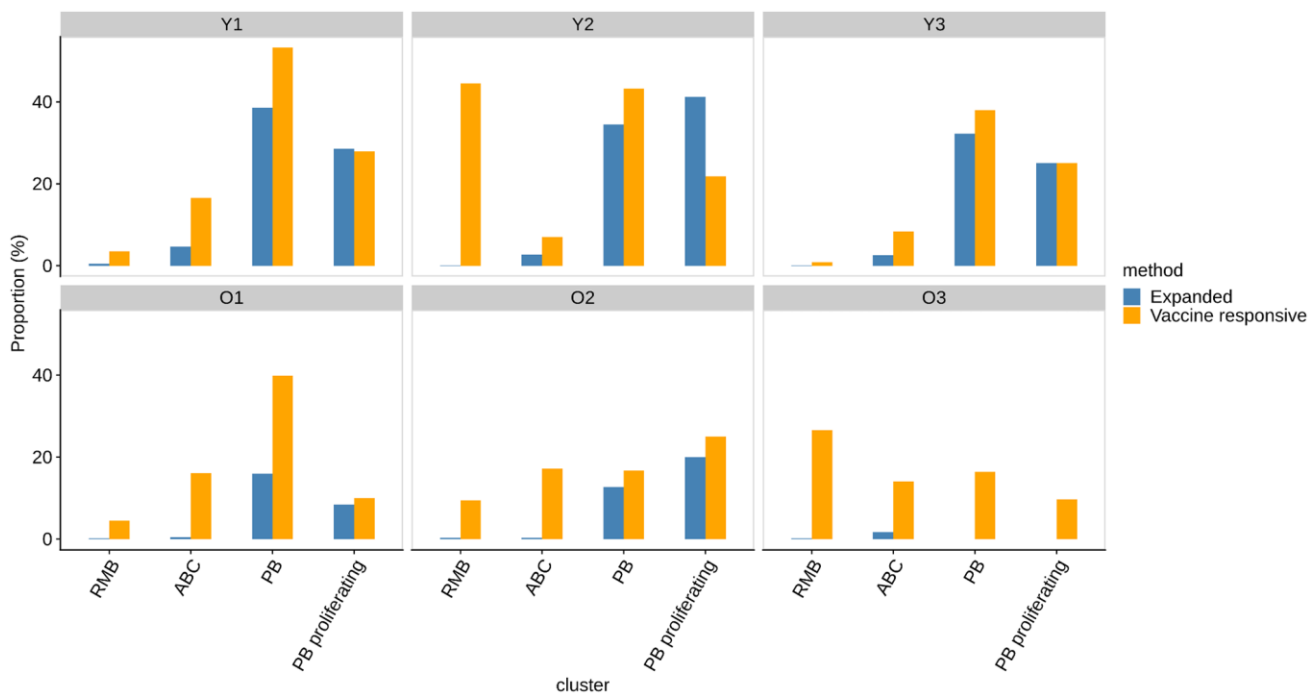

**Supplementary Figure 6. Percentage of cell types identified as clonally expanded or vaccine responsive at D7.**

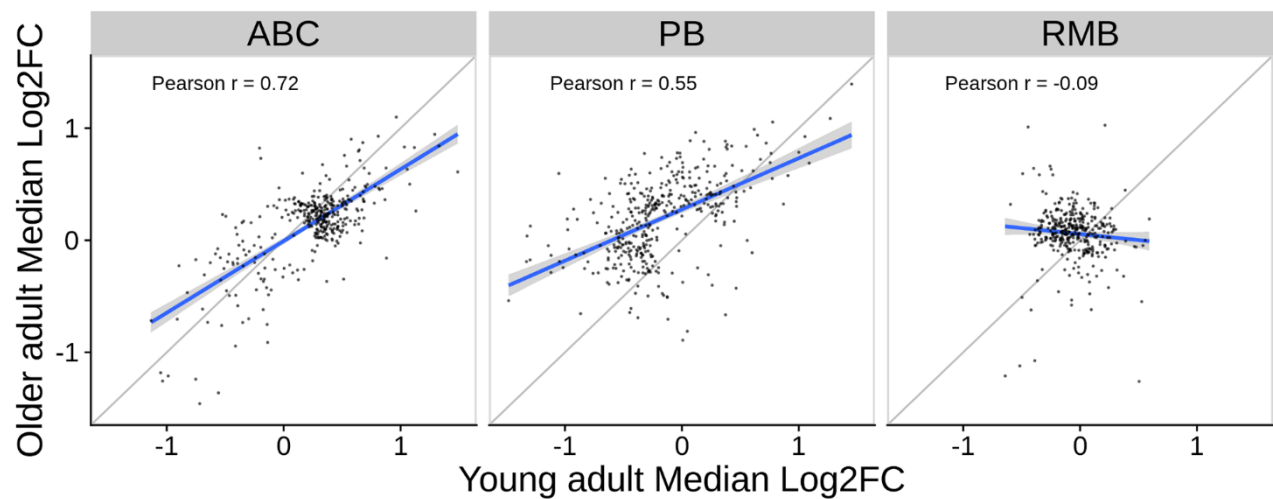

**Supplementary Figure 7. Correlation of medians of log2 fold changes of differentially expressed genes between young and older subjects.**

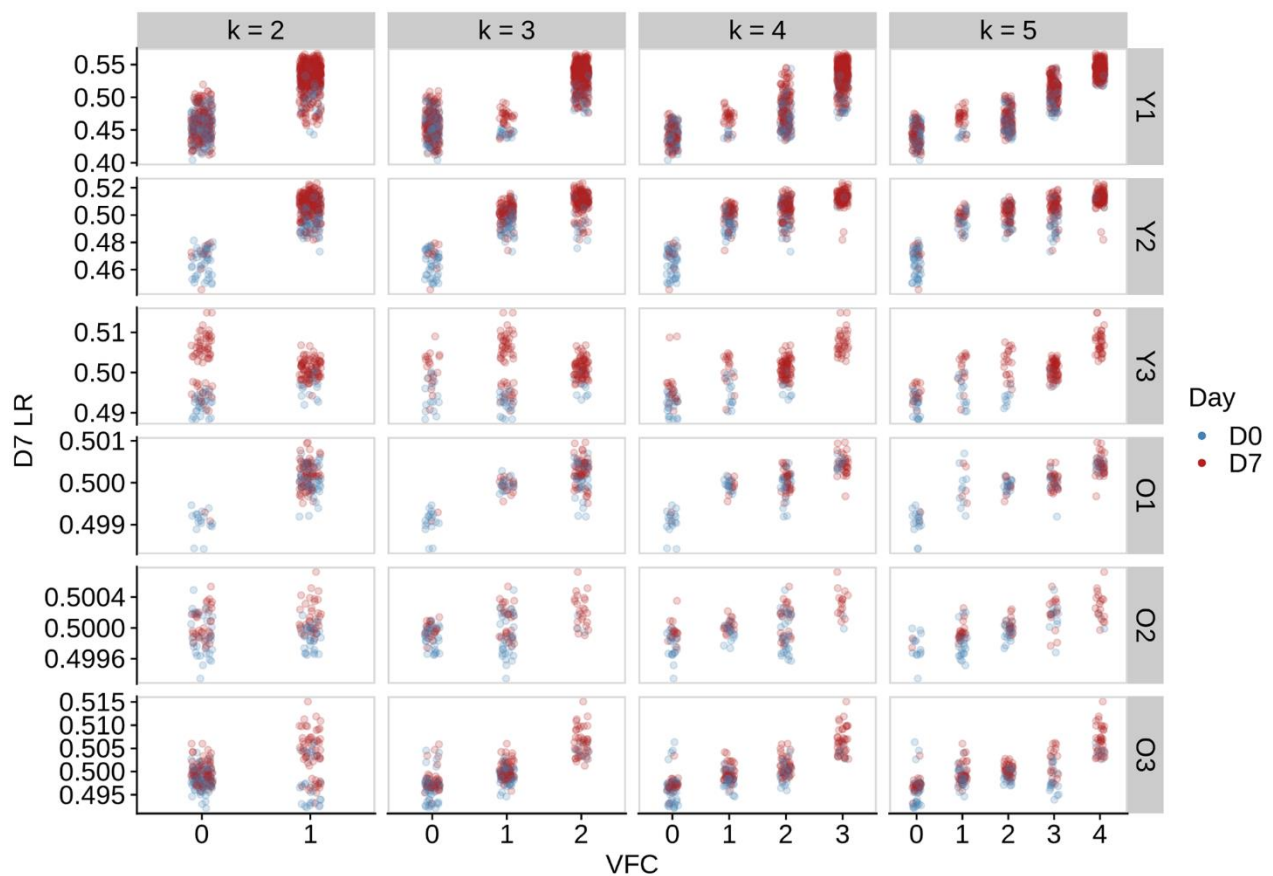

**Supplementary Figure 8. Choice of the number of VFC clusters  $k$  to identify vaccine-responsive PB subpopulations.** The x-axis is the cluster id and the y-axis is the relative likelihood of observing the cell in D7 relative to D0. The color indicates the time points.  $k = 3$  is the final choice of the number of clusters.

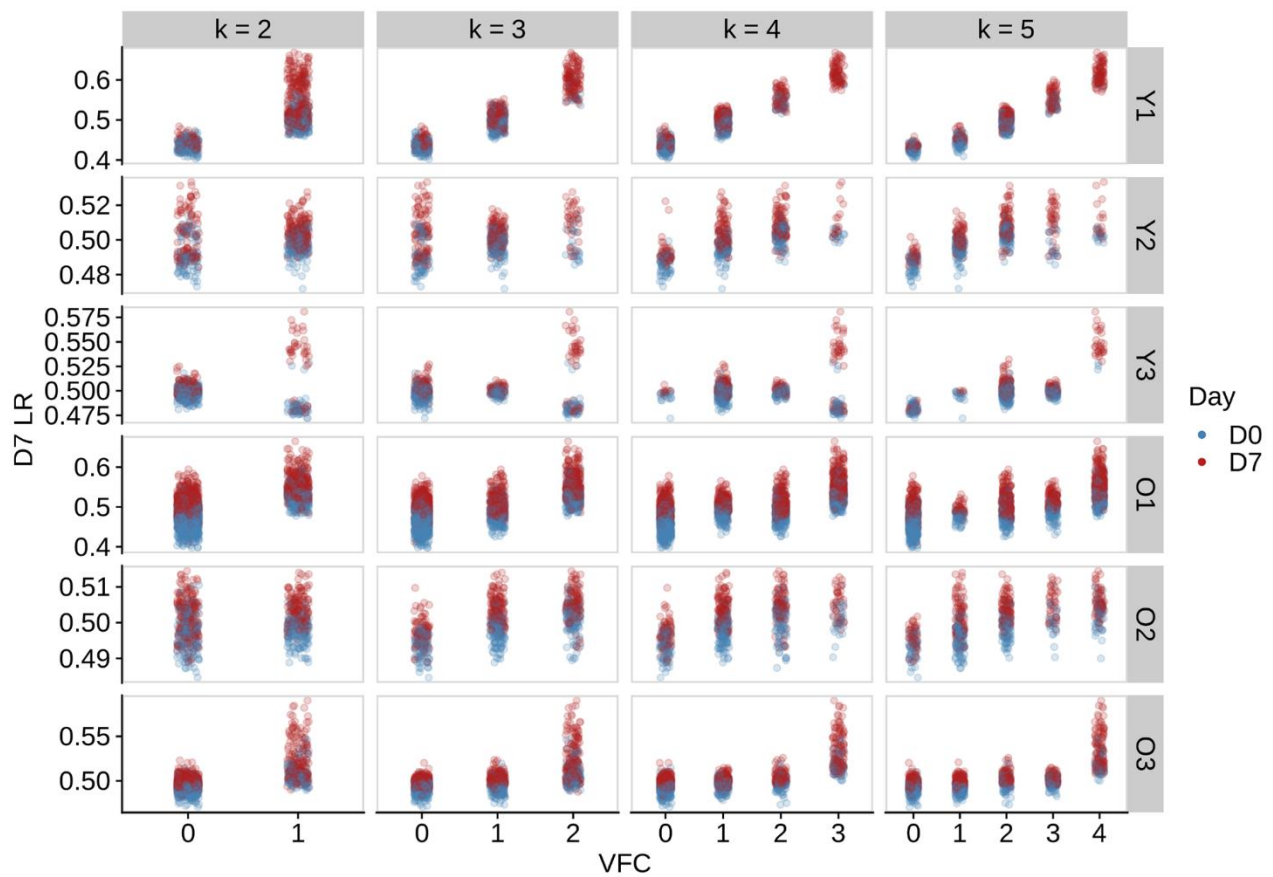

**Supplementary Figure 9. Choice of the number of VFC clusters  $k$  to identify vaccine-responsive ABC subpopulations.** The x-axis is the cluster id and the y-axis is the relative likelihood of observing the cell in D7 relative to D0. The color indicates the time points.  $k = 3$  is the final choice of the number of clusters.

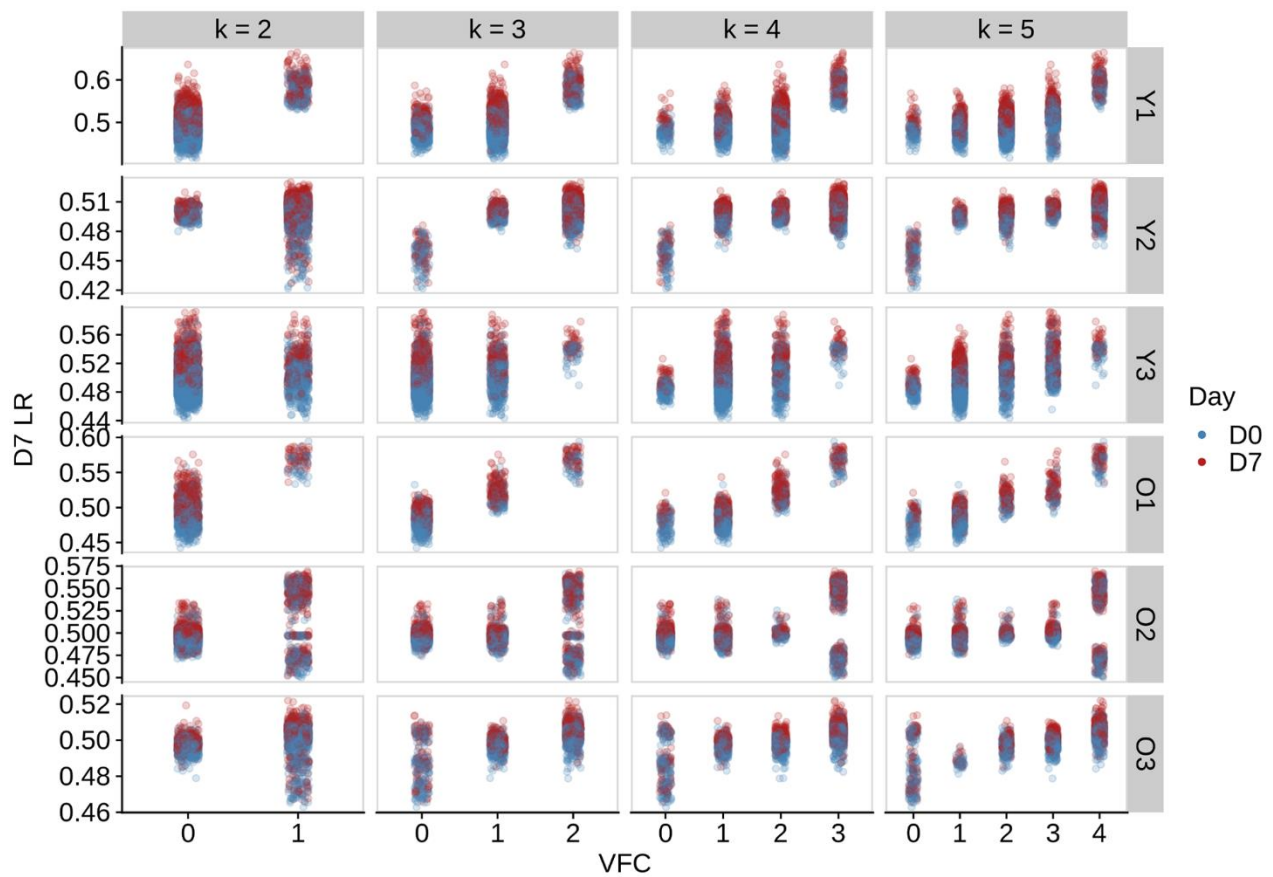

**Supplementary Figure 10. Choice of the number of VFC clusters  $k$  to identify vaccine-responsive RMB subpopulations.** The x-axis is the cluster id and the y-axis is the relative likelihood of observing the cell in D7 relative to D0. The color indicates the time points.  $k = 3$  is the final choice of the number of clusters.

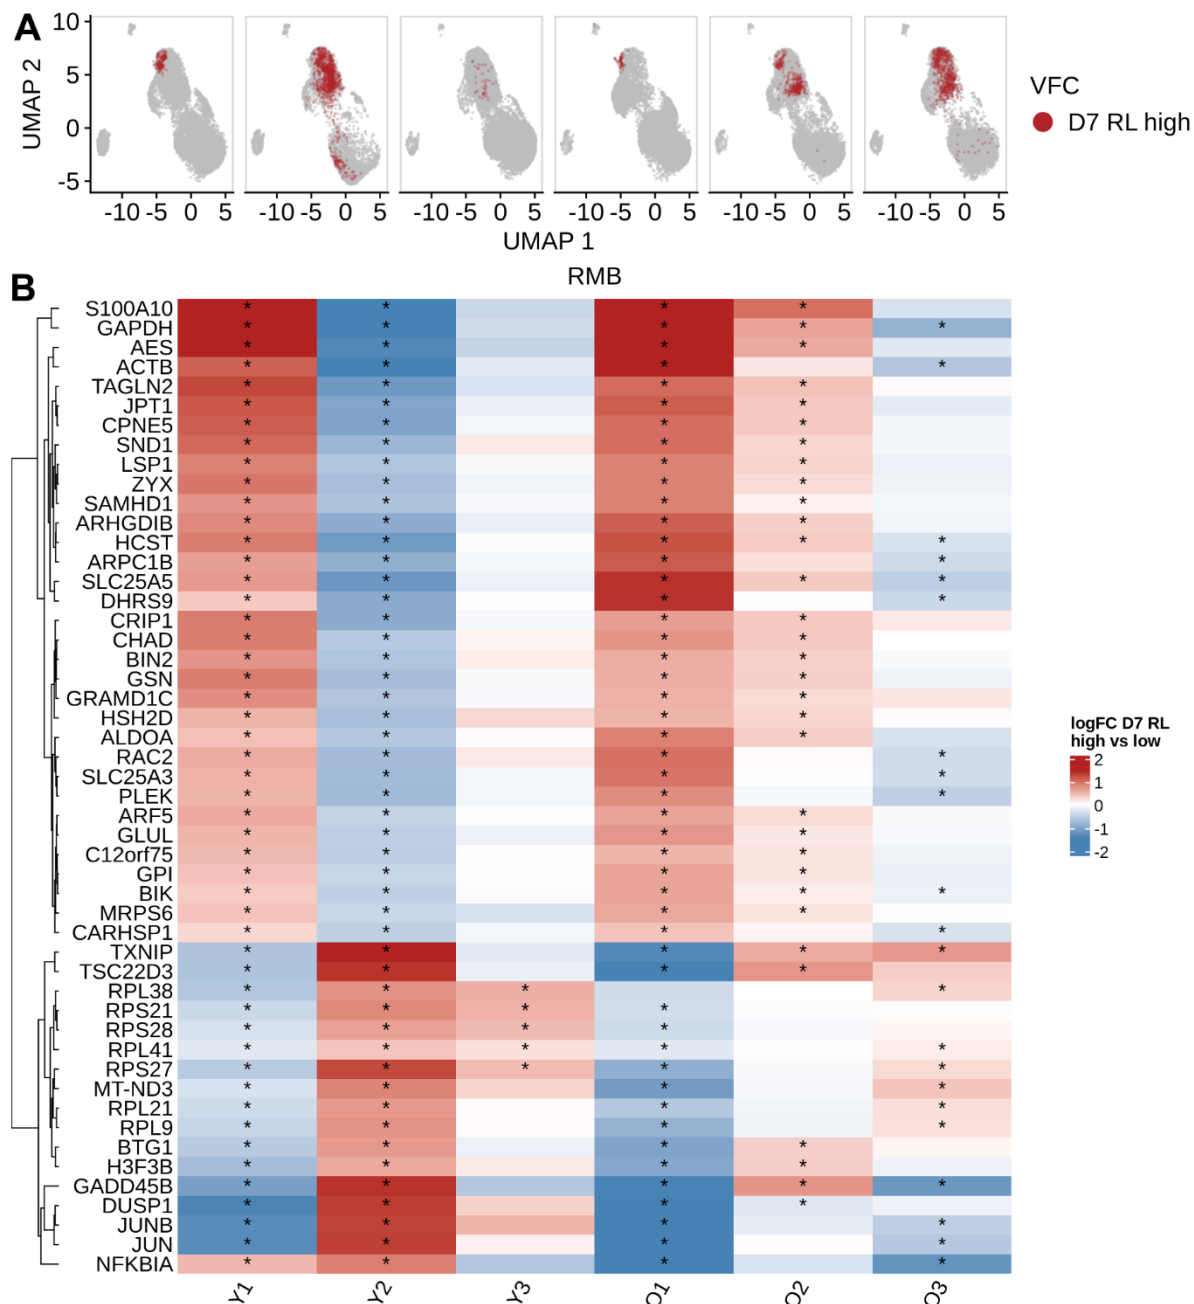

**Supplementary Figure 11. Identifying vaccine-responsive subpopulations within resting memory B cells.** (A) MELD was used to visualize the subset of resting memory B cells that increases most on day 7. (B) 34 differentially expressed genes between vaccine-responsive RMB and the rest of RMB. Wilcoxon rank-sum test was used to select differentially expressed genes comparing day 7 and day 0 samples of individual subjects. log<sub>2</sub> fold change of count values was computed for the differentially expressed genes. Genes that significantly differ between time points, and have an average log<sub>2</sub> fold change greater than 0.3 in at least one patient, were selected for visualization. The asterisk indicates an FDR-adjusted p-value for the Wilcoxon rank-sum test smaller than 0.05.

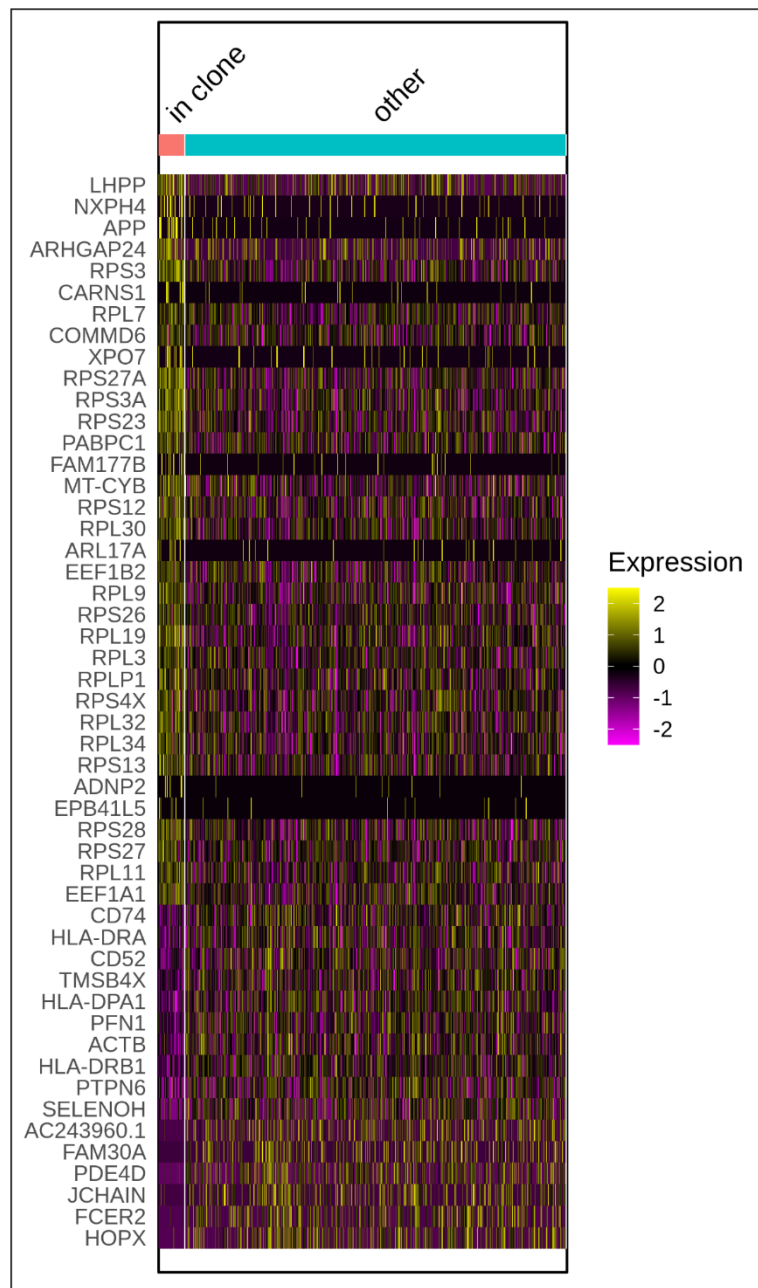

**Supplementary Figure 12. Differentially expressed genes between the large, persistent clone and the resting memory IgG B cells in O3 at D0.**
